# Supplementary material for: Al(iii) and Ga(iii) triflate complexes as solvate ionic liquids: speciation and application as soluble and recyclable Lewis acidic catalysts
Source: Royal Society of Chemistry journal article supplement (doi:10.1039/d4dt02314e), 2024-01-01
Supplement: d4dt02314e1.pdf [file d4dt02314e1.pdf]

## Supporting Information

### Al(III) and Ga(III) triflate complexes as solvate ionic liquids: speciation and application as soluble and recyclable Lewis acidic catalysts

Justyna Więclawik,<sup>a</sup> Alina Brzęczek-Szafran,<sup>a</sup> Sebastian Jurczyk,<sup>b</sup> Karolina Matuszek,<sup>c</sup> Małgorzata Swadźba-Kwaśny<sup>\*d</sup> and Anna Chrobok<sup>\*a</sup>

#### Gas chromatography analysis

GC analyses were performed using a Shimadzu GC-2010 Plus equipped with a ZB-50 column (30m × 0.25mm × 0.25µm film) and an FID detector.

#### Thermogravimetric analysis

The thermogravimetric analysis was performed for each of the prepared SILs as well as for its precursors on a thermobalance (Mettler Toledo TGA851e). Under N<sub>2</sub> 60.0 ml/min applied temperature range 25.0-600.0°C and ramp 10.0°C/min.

#### Procedure for synthesis of Al(NTf<sub>2</sub>)<sub>3</sub>

The Al(NTf<sub>2</sub>)<sub>3</sub> was synthesized in a glovebox under an inert argon atmosphere (<0.6 ppm O<sub>2</sub> and H<sub>2</sub>O). The HNTf<sub>2</sub> (1.07 g, 3.8 mmol) was weighed into a round-bottom flask with anhydrous toluene (11 ml) and trimethylaluminum solution 2.0 M in toluene (1.25 g; 15.1 mmol) was added. The mixture was stirred in glovebox (24°C, 12 h, 200 rpm) and subsequently the solvent was evaporated at Schlenk line to obtain white solid. <sup>27</sup>Al NMR (CDCl<sub>3</sub>) δ<sub>Al</sub> : -14.8 (s), -16.2 (s), -17.6 ppm (s). <sup>19</sup>F NMR (CDCl<sub>3</sub>) δ<sub>F</sub> : -80 to -85 ppm (m).

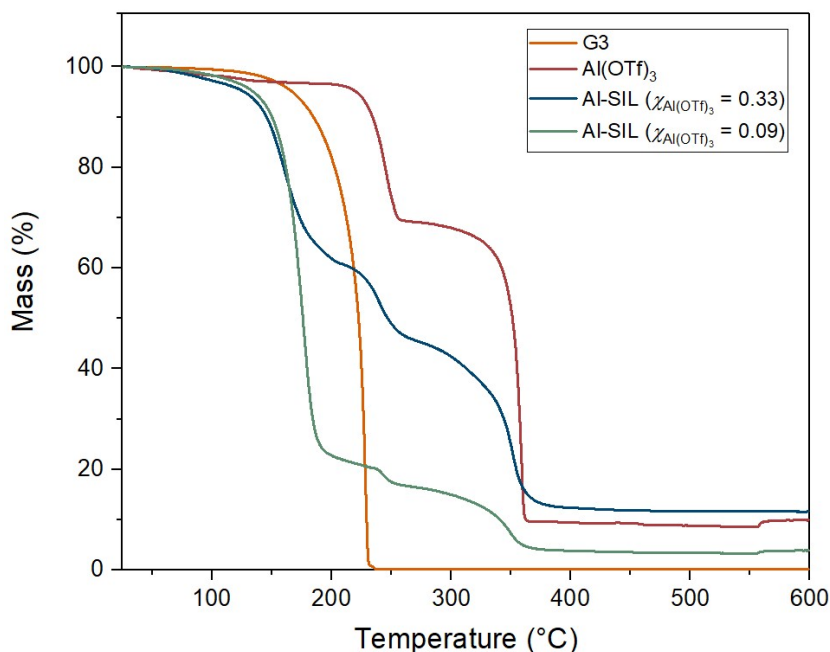

Figure S1. TGA for triglyme, Al(OTf)<sub>3</sub>, Al-SILs in χ<sub>Al(OTf)<sub>3</sub></sub> = 0.33 and 0.09.

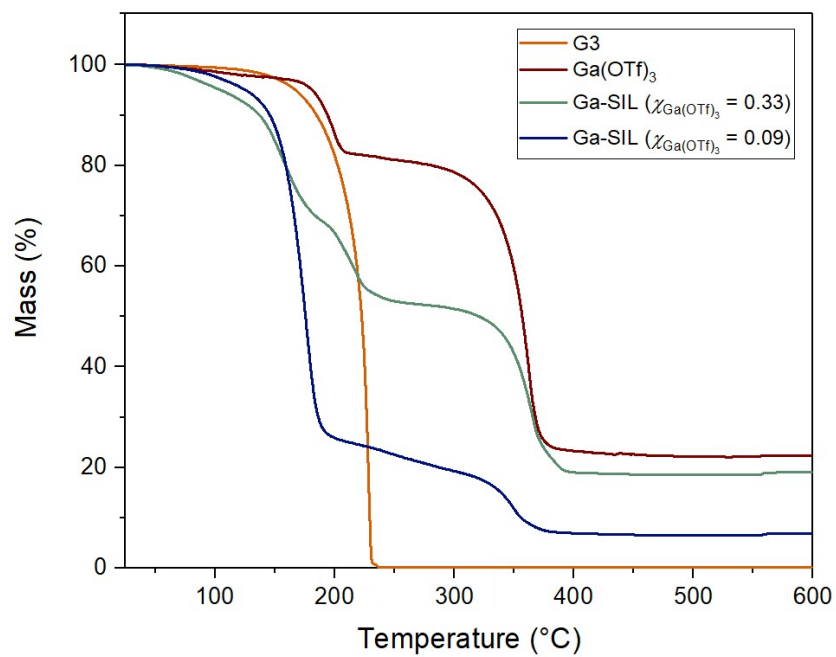

Figure S2. TGA for triglyme, Ga(OTf)<sub>3</sub>, Ga-SILs in χ<sub>Ga(OTf)<sub>3</sub></sub> = 0.33 and 0.09.
